# Supplementary material
Source: Springer Nature journal article supplement (https://www.springermedizin.de/resource/supplementary/12893_2009_134_MOESM1_ESM.pdf/9513054)
Supplement: MOESM1 [file 9513054]

741384  
924  
AR

CT ANGIO HEAD W/W  
Refc  
3/15/2008 12:07  
001  
100ML OPTI

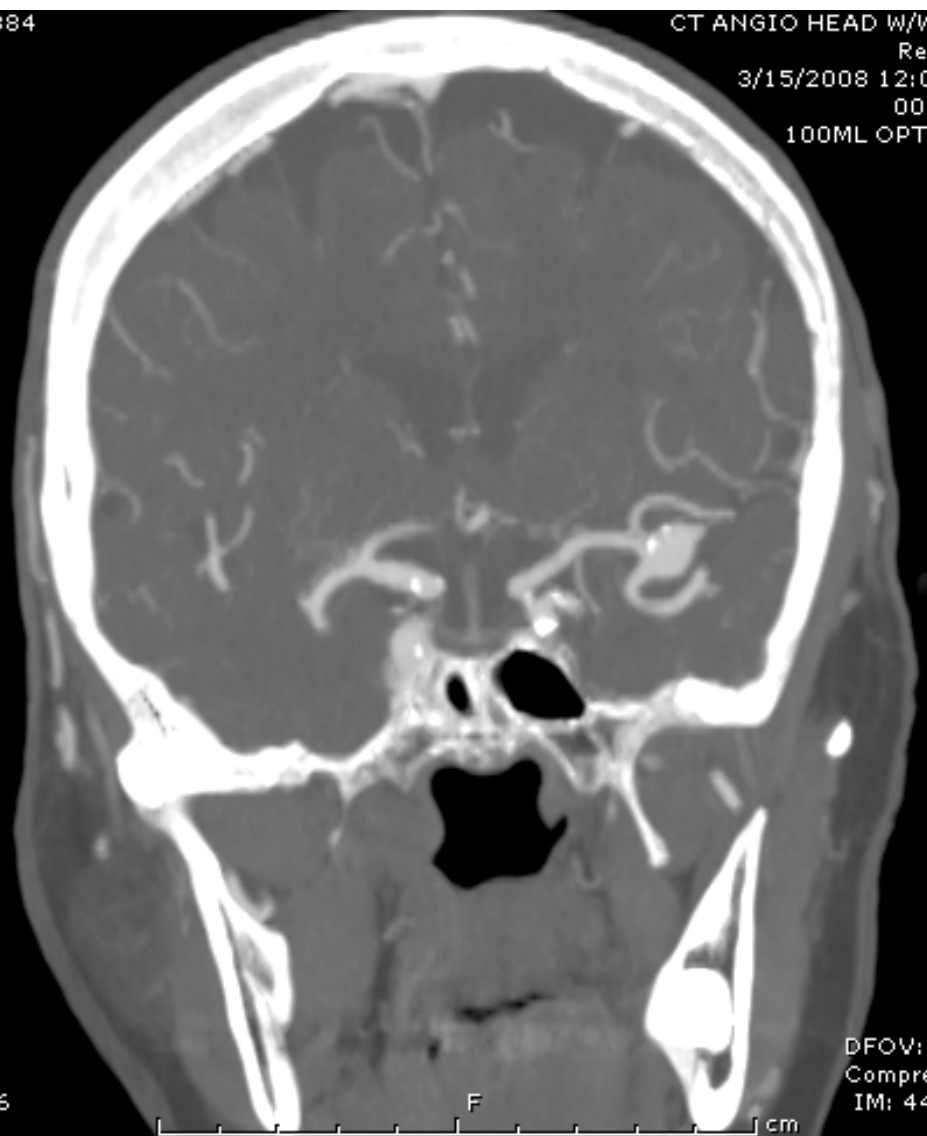

44  
120  
o: 1  
4 of 6

DFOV: 2  
Compress  
IM: 44

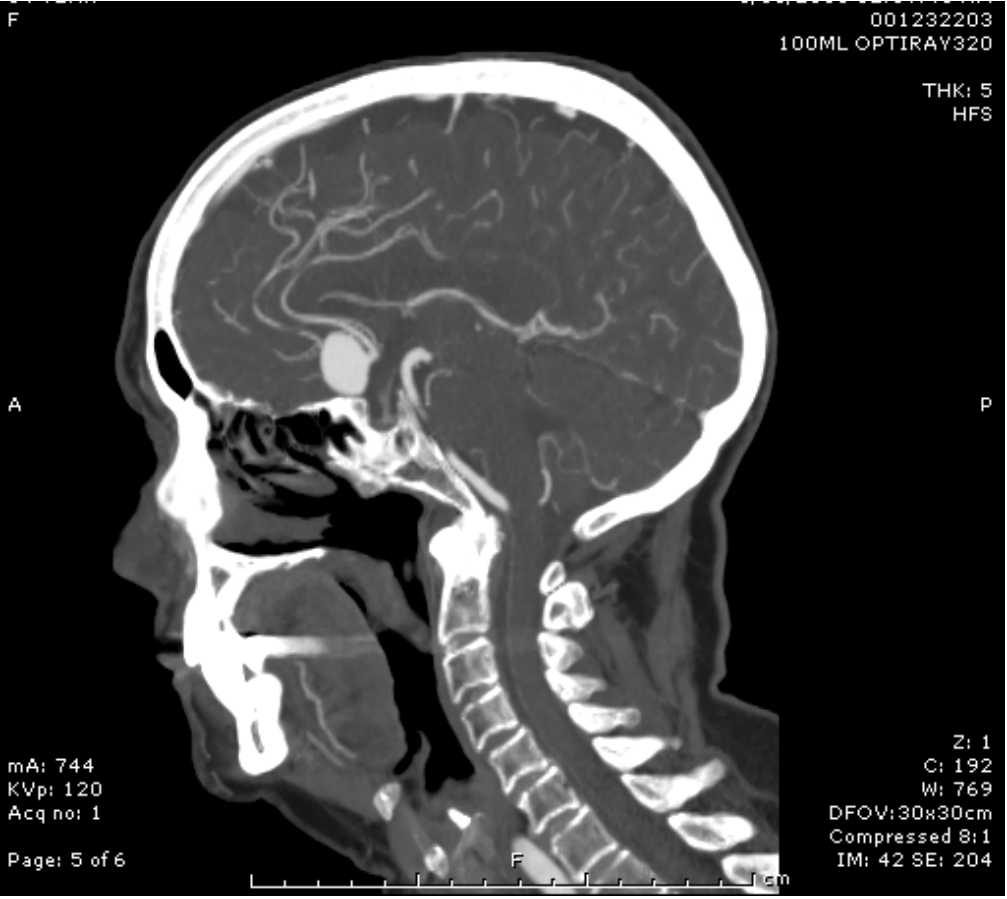

001232203  
100ML OPTIRAY320

THK: 5  
HFS

mA: 744  
KVp: 120  
Acq no: 1  
Page: 5 of 6

Z: 1  
C: 192  
W: 769  
DFOV: 30x30cm  
Compressed 8:1  
IM: 42 SE: 204
